# Supplementary material for: Synthesis, characterization and fabrication of ultrathin iron pyrite (FeS2) thin films and field-effect transistors
Source: Royal Society of Chemistry journal article supplement (doi:10.1039/c5ra23344e), 2016-01-01
Supplement: c5ra23344e1.pdf [file c5ra23344e1.pdf]

Supporting Information for

# Synthesis, Characterization and Fabrication of Ultrathin Iron Pyrite (FeS<sub>2</sub>) Thin Films and Field- effect Transistors

Xi Liu<sup>a,b,c</sup>, Zhaojun Liu<sup>\*a,b,c</sup>, Jacob Y. L. Ho<sup>c</sup>, Man Wong<sup>c</sup>, and Hoi Sing Kwok<sup>c</sup>

<sup>a</sup> Sun Yat-sen University–Carnegie Mellon University Joint Institute of Engineering, Sun Yat-sen University, Guangzhou, China. E-mail: eezhj@ust.hk

<sup>b</sup> Sun Yat-sen University–Carnegie Mellon University Shunde International Joint Research Institute, Sun Yat-sen University, Guangdong, China

<sup>c</sup> State Key Lab on Advanced Displays and Optoelectronics, Department of Electronic and Computer Engineering, Hong Kong University of Science and Technology, Clear Water Bay, Kowloon, Hong Kong

\*To whom correspondence should be addressed. E-mail: eezhj@ust.hk

## I. Calculation of the Device Parameters

Table 2 in the main text lists a few device parameters that were calculated. The capacitance of

oxide is calculated from  $C_{ox} = (\epsilon_{SiO_2} \epsilon_0) / T_{ox}$ .

The on and off current is the average current of the corresponding region in the  $I_{ds}$  vs.  $V_{ds}$  plot.

The  $I_{on}/I_{off}$  ratio is simply the ratio of the on and off current, and the On-state resistance is the average resistance from the on state region.

The mobility is determined from the following equation:

$I_D = \mu C_{ox} \frac{W}{L} (V_{GS} - V_T) V_{DS}$  for  $|V_{DS}| \ll (V_{GS} - V_T)$ , which is the standard equation used to calculate the

MOSFET biased with a small drain-to-source voltage in the linear region.

Resistivity ( $\rho$ ) is based on the device diameter and the resistance at  $V_g=0$  V. In our case, the

FeS<sub>2</sub> thin film is highly doped, and the carrier concentration of the device can be calculated from

$$n = \frac{1}{q\mu\rho}.$$

## II. Structure characterization and optical properties of FeS<sub>2</sub> thin film on quartz substrate

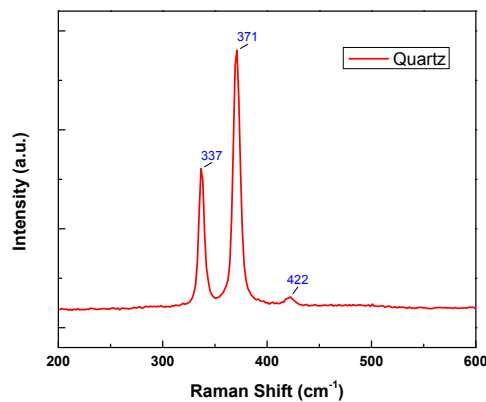

**Figure S1.** Raman spectrum of FeS<sub>2</sub> thin film on quartz.

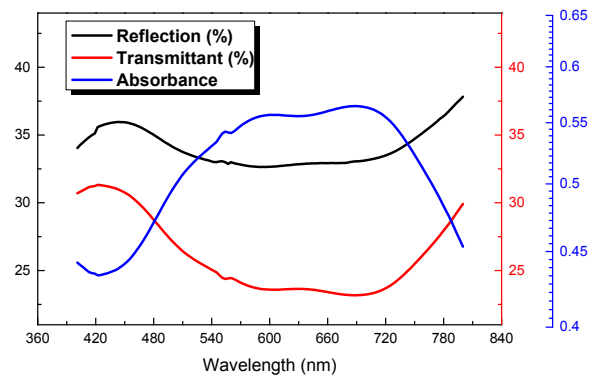

**Figure S2.** Optical properties of FeS<sub>2</sub> thin film on quartz.

The optical measurement is conducted by a Lambda 20 (Perkin Elmer) UV/VIS Spectrophotometer. The result is a direct measurement of the sample with the substrate. Hence the reflection and transmittant of the substrate is not remove.
